(anti-SARS-CoV-2 IgG) performed, 57 tested positive (1.02 %). All HCW with a positive IgG had a concurrent negative PCR.

**Conclusion:** In this cross-sectional evaluation, the point prevalence of SARS-CoV-2 IgG in asymptomatic HCWs at UC San Diego was less than 1%, supporting modeling estimations at the San Diego County level of very low levels of community exposure at the time of this testing.

Further analyses of incidence rates and potential risk factors such as employee roles within the healthcare system, community and healthcare exposures, and home zip code are underway.

Asymptomatic HCW testing is a strategy that can provide the perception of additional safety to both the workforce and patients as the health system reopens, while potentially reduce transmission from asymptomatic persons through active case finding and isolation.

**Disclosures:** Randy Taplitz, MD, Merck (Advisor or Review Panel member)

#### 438. Characteristics and Epidemiology of a Native American Community with a High Prevalence of COVID-19

Nicole A. Bratsch, n/a<sup>1</sup>; Natalie Campbell, n/a<sup>1</sup>; James McAuley, MD, MPH<sup>2</sup>; Ryan M. Close, MD, MPH<sup>2</sup>; <sup>1</sup>Whiteriver Indian Hospital, Pinetop, Arizona; <sup>2</sup>Indian Health Service, Whiteriver, AZ

**Session:** P-14. COVID-19 Epidemiology and Screening

**Background:** COVID research and reporting has focused on large urban populations. However, limited data suggests that rural Native American (NA) populations are disparately impacted. We serve a well-defined NA population of ≈18,000 that is relatively geographically isolated in the White Mountains of eastern Arizona. Our first case SARS-CoV-2 was confirmed April 1<sup>st</sup>. We have since confirmed an attack rate significantly higher than most of the United States. We provide testing and case trends in addition to characteristics of the first 800 cases.

**Methods:** We sequentially reviewed the charts of all laboratory-confirmed COVID-19 patients from April 1 to June 3, 2020. In addition to calculating prevalence and rates, we provided summary statistics that were used to describe testing breakdown, demographics, symptoms, and co-morbidities.

**Results:** From April 1 to June 3, we tested 2,662 persons, of which 884 (33.2%) were positive. The estimated prevalence of the time of writing is 4.9% and the rate of 4,911 per 100,000 persons. Data compiled from the first 800 laboratory-confirmed patients is summarized in table 1. Median age for confirmed cases was 40.6 (IQR 28–54). 555 cases (72.1%) were symptomatic. The most common symptoms were cough (67.7%), subjective fever (39.5%), and muscle aches (36.8%). 30.6% of confirmed cases were asymptomatic at the time of testing. The majority of cases were among persons aged 30–39 years (22.9%). Some of the most common comorbidities in confirmed cases included cardiovascular disease (30.4%), substance abuse (30.1%), and diabetes (25.0%). There were 18 (2.04%) deaths.

Clinical findings among symptomatic patients

Table 1: Clinical findings among symptomatic patients (n=555)

| Sign or symptom            | N (%)      |
|----------------------------|------------|
| Documented Fever           | 96 (17.3)  |
| Subjective Fever           | 219 (39.5) |
| Chills                     | 183 (33.0) |
| Muscle Aches               | 204 (36.8) |
| Runny Nose                 | 175 (31.5) |
| Sore Throat                | 97 (17.5)  |
| Cough                      | 376 (67.7) |
| Dyspnea                    | 184 (33.2) |
| Nausea or Vomiting         | 82 (14.8)  |
| Headache                   | 180 (32.4) |
| Abdominal Pain             | 61 (11.0)  |
| Diarrhea                   | 83 (15.0)  |
| Loss of Taste and/or Smell | 38 (6.8)   |
| High Risk Factors          | No (%)     |
| Age >65                    | 89 (10.3)  |
| Chronic Lung Disease       | 91 (11.7)  |
| Diabetes                   | 200 (26.7) |
| Cardiovascular Disease     | 243 (31.4) |
| Chronic Renal Disease      | 36 (4.7)   |
| Chronic Liver Disease      | 37 (5.0)   |
| Immunocompromised          | 10 (1.3)   |
| Substance Abuse            | 241 (29.7) |
| Current or Former Smoker   | 185 (23.4) |

**Conclusion:** We observed a significantly higher prevalence (10-times) and attack rate of (17-times) COVID-19 in a well-defined NA population, when compared to the general Arizona population. We provide characteristics of these cases and report that nearly a third were asymptomatic at the time of testing. More research is needed to understand the rapid spread of COVID-19 in vulnerable rural communities.

**Disclosures:** All Authors: No reported disclosures

#### 439. Clinical Characteristics and Mortality of an Initial Cohort of COVID-19 Patients in México City

Paulo F. Castañeda-Mendez, MD PhD<sup>1</sup>; José Luis Castillo-Álvarez, n/a<sup>1</sup>; Armando Barragán-Reyes, n/a<sup>1</sup>; Daniela Bay-Sansores, n/a<sup>1</sup>; Jessica Isabel Pulido-Enríquez, n/a<sup>1</sup>; Luis Humberto González-Ramírez, MD<sup>1</sup>; Maria Lorena Cabrera-Ruiz, MD<sup>1</sup>; Daniel Aguilar-Zapata, MD<sup>2</sup>; Javier Reyes-Mar, MD<sup>1</sup>; Luis Enrique Soto-Ramírez, MD PhD<sup>1</sup>; <sup>1</sup>Medica Sur, Mexico City, Distrito Federal, Mexico; <sup>2</sup>Hospital Medica Sur, Mexico City, Distrito Federal, Mexico

**Session:** P-14. COVID-19 Epidemiology and Screening

**Background:** As of today, more than 8 million people have been infected and around 440,000 of them have lost their lives due to complications of SARS-CoV-2 infection.

The first confirmed case of COVID-19 in Mexico was on February 28, 2020, and currently, there are more than 150,300 confirmed cases and more than 17,500 deaths have been reported, this work presents the characteristics of the first cases on a tertiary care center with special focus on common comorbidities in Mexicans.

**Methods:** We conducted a case series of patients with the diagnosis of pneumonia due to SARS-CoV-2 virus admitted to a tertiary care center in Mexico City, between March 14th and May 4th, 2020. Data collected included demographic information, comorbidities, clinical presentation, and outcomes. Regarding clinical outcomes, we measured the need of admission to Intensive Care Unit (ICU), mortality during hospitalization, discharge, and patients that remained hospitalized.

**Results:** 85 patients were included, median age 53.5 years; 69.4% were male. Most common clinical manifestations at admission were fever (61, 71.8%), cough (29, 34.1%), headache (25, 29.4%) and dyspnea (22, 25.9%). Most common comorbidities were overweight (44/82, 53.6%), obesity (25/82, 30.5%), hypertension (18, 21.2%), and diabetes (17, 20%).

31 of 85 (36.5%) patients were diagnosed with critical disease, whereas 54 of 85 (63.5%) were classified as non-critical. In the 31 critically ill patients, the length of invasive mechanical ventilation was 13 days [range {2–45}]; 5 patients (16.1%) required tracheostomy. The mean of mechanical ventilation prior to tracheostomy was 19.8 days [range {14–25}].

In all patients, the total length of hospitalization was 12.1 days [range {2–52}], 14.8 days [range {3–52}] in ICU patients, and 6.7 days [range {2–30}] in floor unit patients. No readmissions were documented.

Global mortality was 4.7% (9.6% in ICU, 1.8% in floor unit). Of the 4 deceased patients, 3 presented comorbidities (75%), while 1 was previously healthy, documenting massive pulmonary embolism as the cause of sudden death.

**Conclusion:** This study shows that the clinical characteristics in this initial cohort are not different that described elsewhere. Mortality is low but it is mainly related to prevalent comorbidities in the Mexican population.

**Disclosures:** All Authors: No reported disclosures

#### 440. Clinical Characteristics of Early Noncritical Hospitalized Patients with Coronavirus Disease 2019 (COVID-19): A Single-Center Retrospective Study in New York City

Michelle Lee, MD<sup>1</sup>; Mona Fayad, MD<sup>1</sup>; Tarub Mabud, MD, MSc<sup>1</sup>; Paulino Tallon de Lara, MD, PhD<sup>2</sup>; Adiac Espinosa Hernandez, MD<sup>1</sup>; Gustavo A. Contreras Anez, MD<sup>1</sup>; Christian Olivo Freitas, MD<sup>2</sup>; Maanit Kholi, MD<sup>1</sup>; Nikhil Chadha, MD<sup>1</sup>; Raymonde Jean, MD<sup>1</sup>; <sup>1</sup>Icahn School of Medicine at Mount Sinai, New York, New York; <sup>2</sup>Icahn School of Medicine at Mount Sinai St Luke's and West Hospitals, New York, NY

**Session:** P-14. COVID-19 Epidemiology and Screening

**Background:** COVID-19 first originated in Wuhan, China, in December 2019. As of April 9, 2020, New York State had become the single largest global epicenter of COVID-19.

**Methods:** This is a retrospective chart review of the first 33 patients with RT-PCR-confirmed COVID-19 admitted from the emergency department to a general medicine unit in a single academic hospital in New York City between March 11th to March 27th, 2020. Patient's demographic, clinical, laboratory, radiographic investigations, treatments and clinical outcomes were retrospectively extracted from the electronic medical record and followed until April 10th, 2020. Patients were divided into severe and nonsevere sub-cohorts. Statistics were descriptive in nature.

**Results:** The study cohort (median age 68 yr, 67% male) presented with subjective fevers (82%), cough (88%), and dyspnea (76%). The median incubation period was 3 days. Most cases met SIRS criteria upon admission (76%). Patients had elevated inflammatory markers. Patients were treated with antimicrobials, corticosteroids, hydroxychloroquine, and varying levels of supplemental oxygen. Mortality was 15% and 18% of the cohort required intensive care services.

**Conclusion:** Patient age, presenting clinical symptoms, comorbidity profile, laboratory biomarkers, and radiographic features are consistent with findings published from China. Severe patients had peaks in inflammatory biomarkers later in the
